# Supplementary material for: Wnt5A signaling supports antigen processing and CD8 T cell activation
Source: Frontiers journal article supplement (doi:10.3389/fimmu.2022.960060), 2022-08-26
Supplement: Data_Sheet_1.pdf [file Data_Sheet_1.pdf]

A

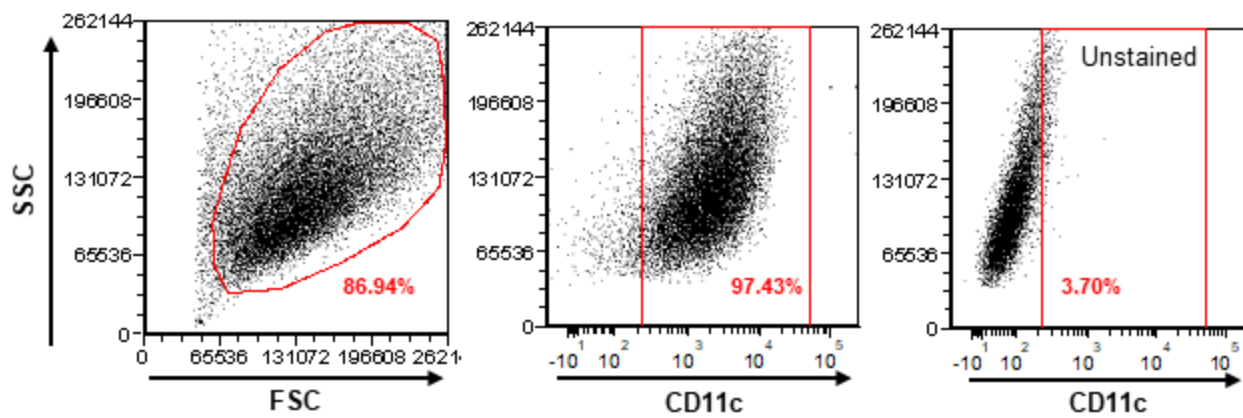

B

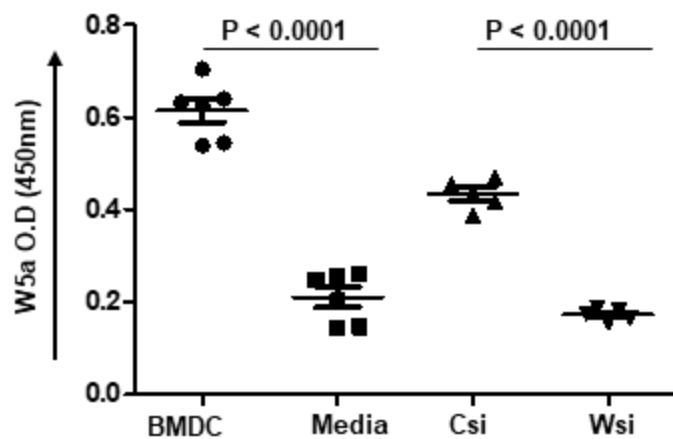

C

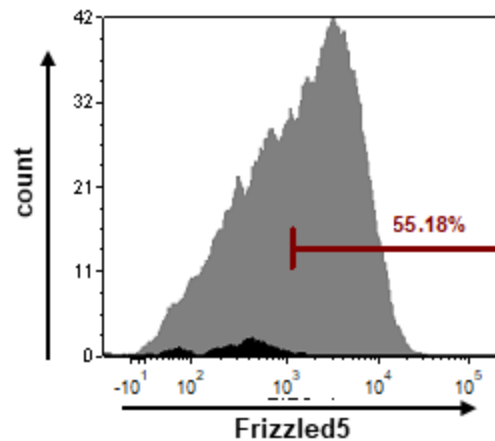

**Figure S1: Bone marrow-derived dendritic cells (BMDC) express Wnt5A and Frizzled5 (Wnt5A receptor):** **A:** Bone marrow-derived dendritic cells were generated from BALB/c mice bone marrow and stained with CD11c antibody to determine purity. FACS dot plot shows the percentage of CD11c positive BMDC. Gating was based on unstained cell dot plot. **B:** ELISA with anti-Wnt5A antibody demonstrating secretion of Wnt5A (W5a) from BMDC as corroborated by its reduction through Wnt5A siRNA (Wsi) mediated depletion of Wnt5A. Cell culture media without BMDC and scramble siRNA (control Csi) transfected cells are used as references for untransfected BMDC and Wnt5A siRNA transfected BMDC respectively. **C:** FACS histogram demonstrating Frizzled5 surface expression on BMDC; secondary antibody control (black histogram) is the reference.

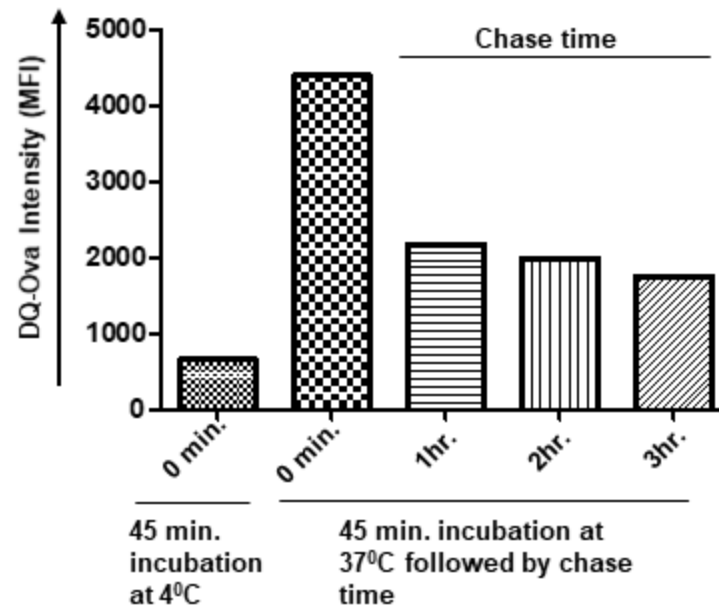

**Figure S2: FACS based MFI plot demonstrating DQ-OVA processing in BMDC.** BMDC was incubated for 45 min. with 5ug/ml DQ-Ova at 37°C and after chase time (0 min. – 3hr.), MFI was measured by FACS. Maximum DQ-OVA fluorescence (as a measure of proteolytic cleavage) was obtained after 45 min. at 37°C. 4°C incubation was used as a negative control. MFI: Mean Fluorescence Intensity (Geometric Mean).

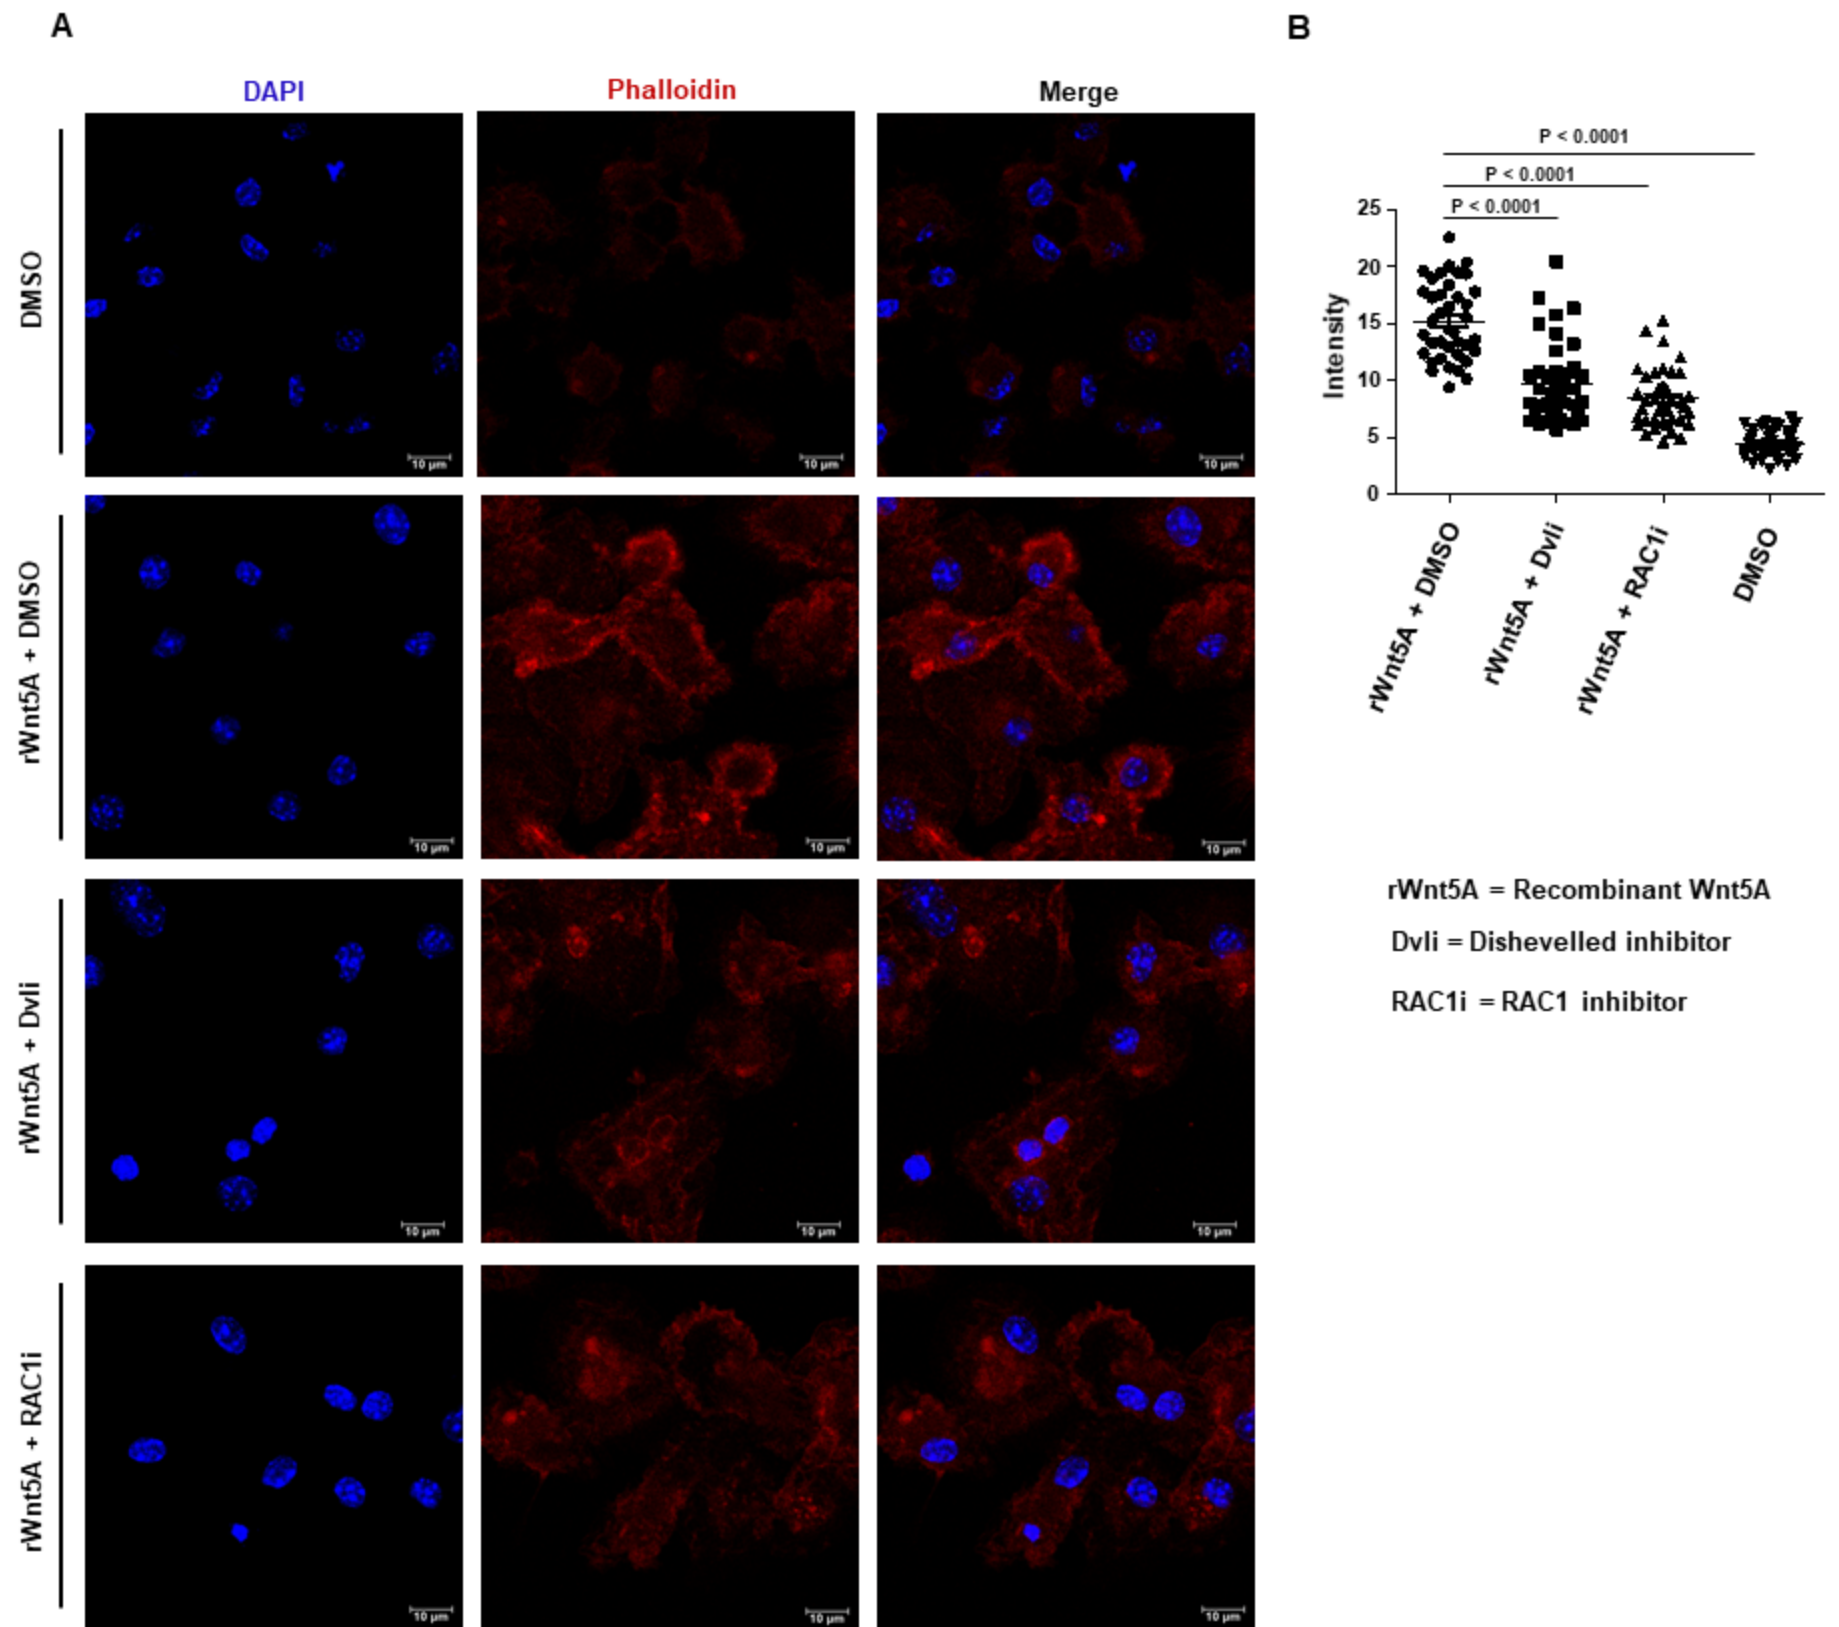

**Figure S3: Inhibition of Wnt5A induced actin assembly in BMDC by Wnt5A signaling inhibitors. A:** Confocal microscopy demonstrating phalloidin (Red) staining as a marker of actin assembly in Wnt5A conditioned BMDC in the presence and absence of Dishevelled and RAC1 inhibitors (n= 2). **B:** Graphical representation of phalloidin intensity as estimated by ImageJ, each dot in the plot representing a cell. DAPI (blue) represents nuclei.

A

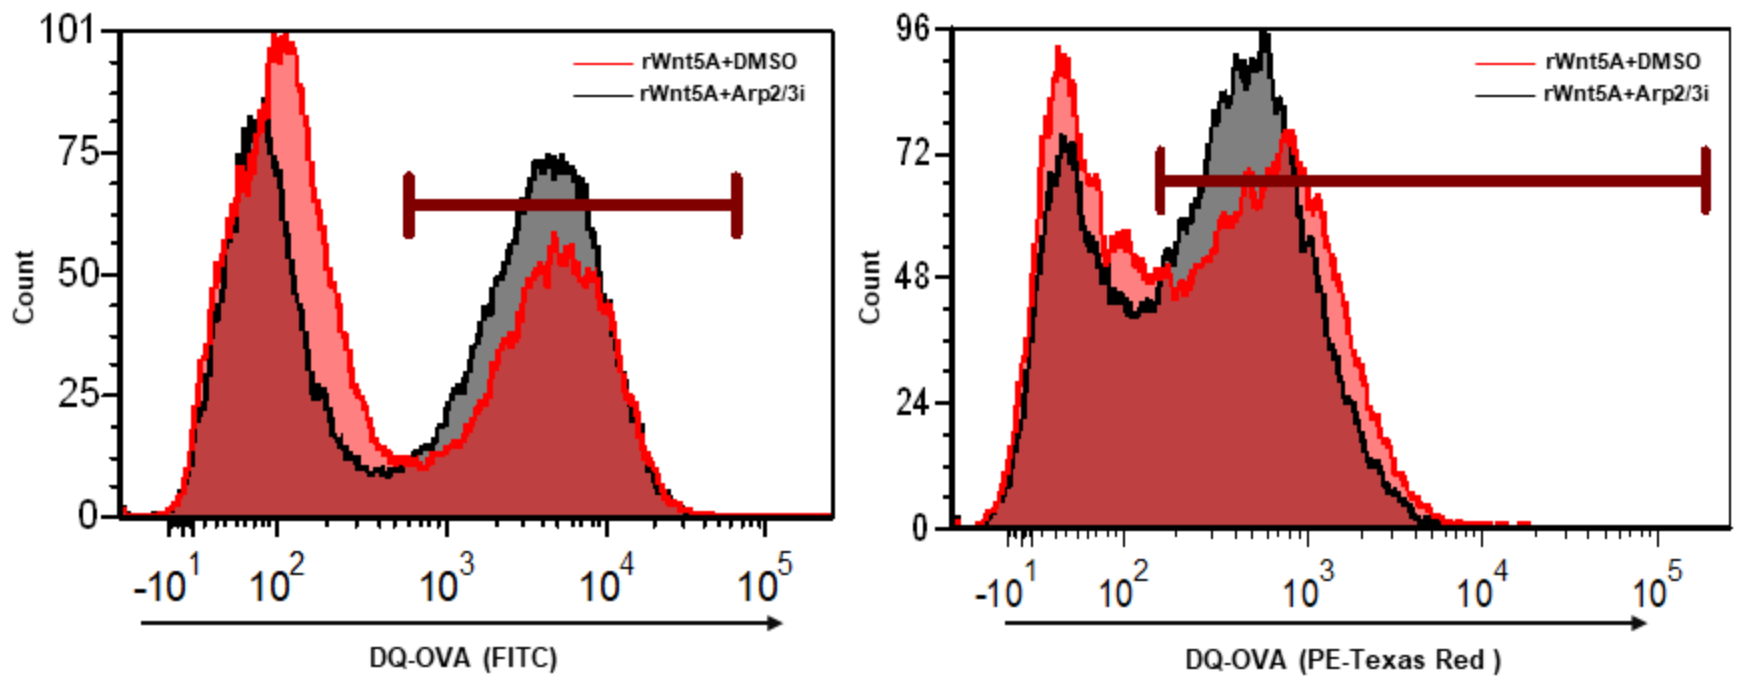

B

Arp2/3i = Arp2/3 inhibitor  
rWnt5A = Recombinant Wnt5A

| Geometric mean |                |                        |                |
|----------------|----------------|------------------------|----------------|
| DQ-OVA (FITC)  |                | DQ-OVA (PE-Texas Red ) |                |
| rWnt5A+DMSO    | rWnt5A+Arp2/3i | rWnt5A+DMSO            | rWnt5A+Arp2/3i |
| 4222.89        | 3787.89        | 628.30                 | 519.30         |

**Figure S4: Inhibition of DQ-OVA processing by Arp2/3 inhibitor.** **A:** FACS histogram represents DQ-OVA processing in BMDC in the FITC channel and PE-Texas Red channel in the presence (black) and absence (red) of Arp2/3 inhibitor, which blocks actin assembly (n= 2). **B:** The table depicts geometric mean values for DQ-OVA processing in different conditions.

**A**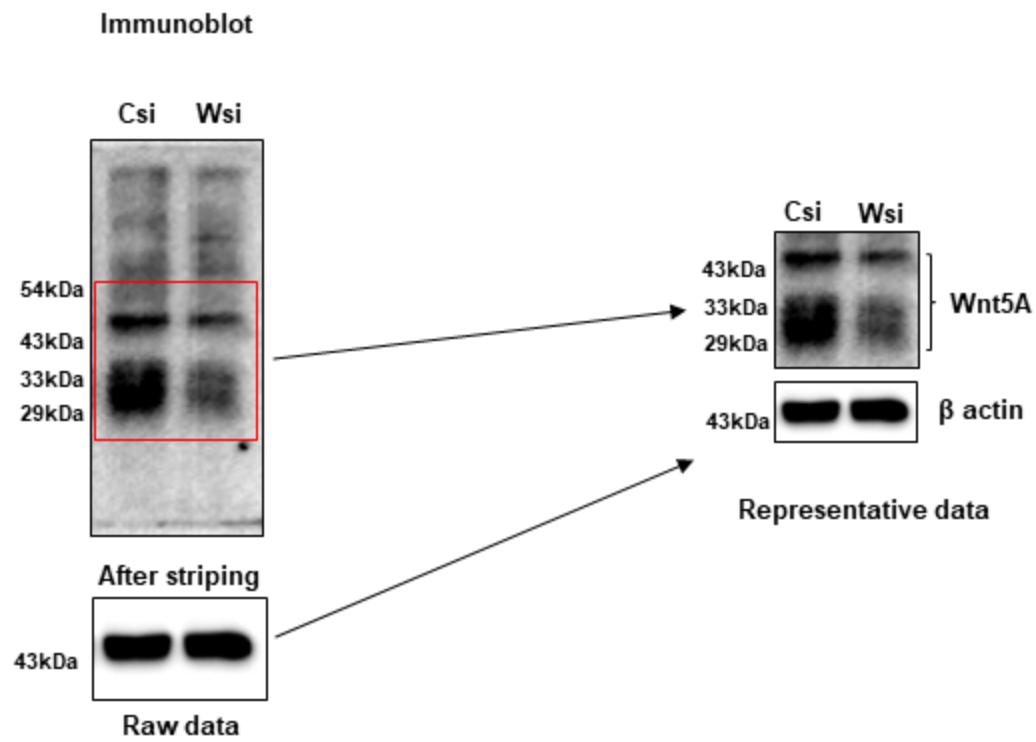**B**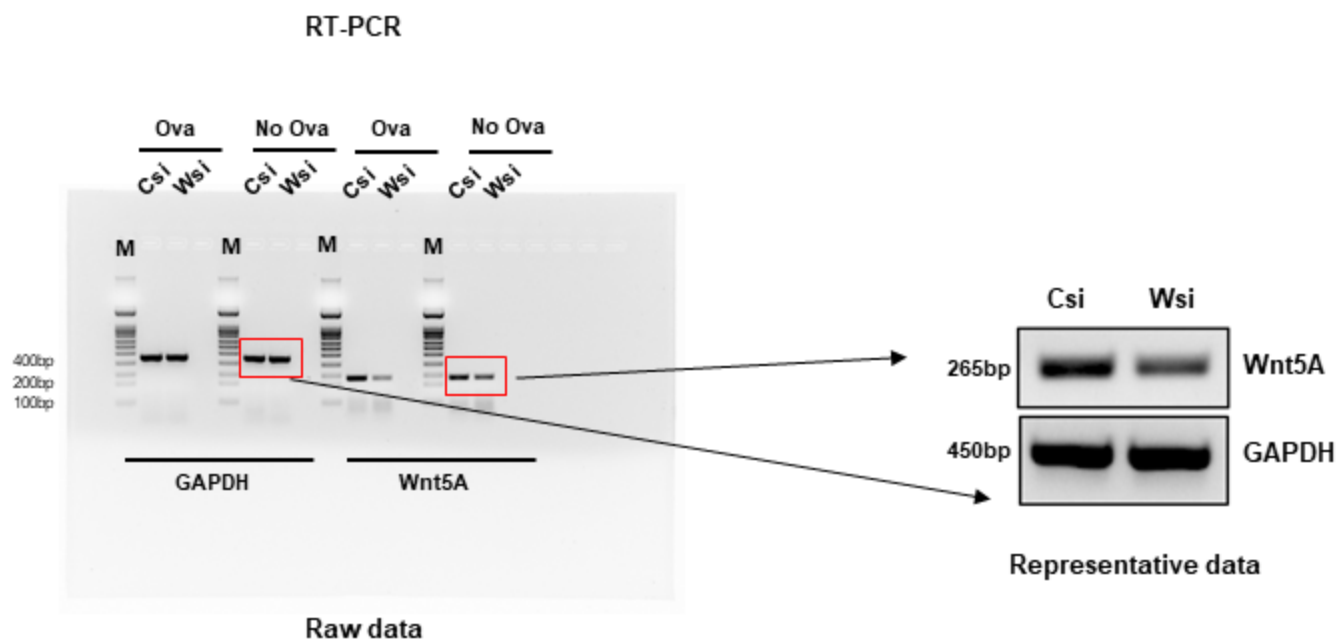

**Figure S5: Representation of raw data related to Figure 1:** **A:** Representation of Wnt5A immunoblot (cropped) from corresponding raw data. Multiple bands indicate the presence of different transcript variants and/or post-translational modifications of Wnt5A. **B:** Representation of RT-PCR (cropped) from corresponding raw data. M: DNA Ladder

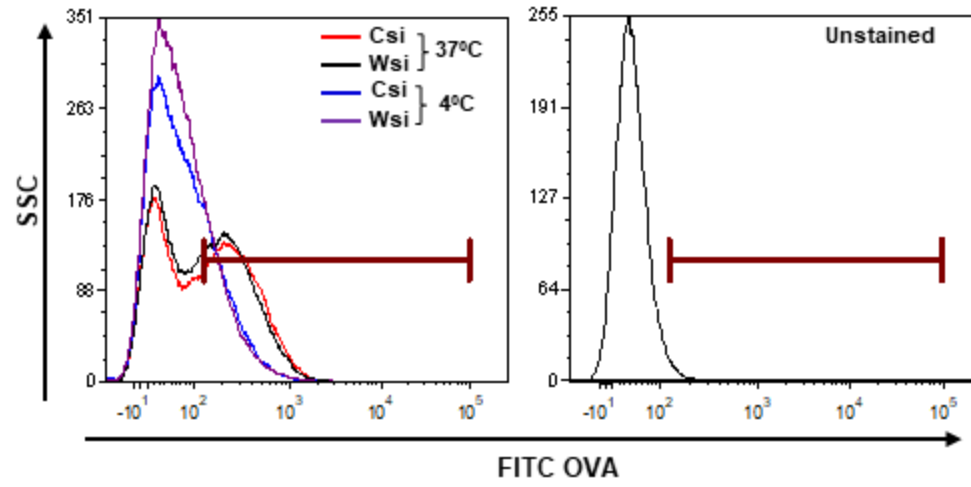

**Figure S6: Wnt5A does not influence OVA uptake by BMDC significantly.** FITC OVA uptake was not significantly influenced by Wnt5A depletion as shown by FACS histogram. There was no significant difference in FITC OVA (5ug/ml) uptake by Wnt5A siRNA (Wsi) and control siRNA (Csi) transfected BMDC following FITC OVA incubation for 45 min. at either 37°C or 4°C. Gating was based on unstained cell histogram.

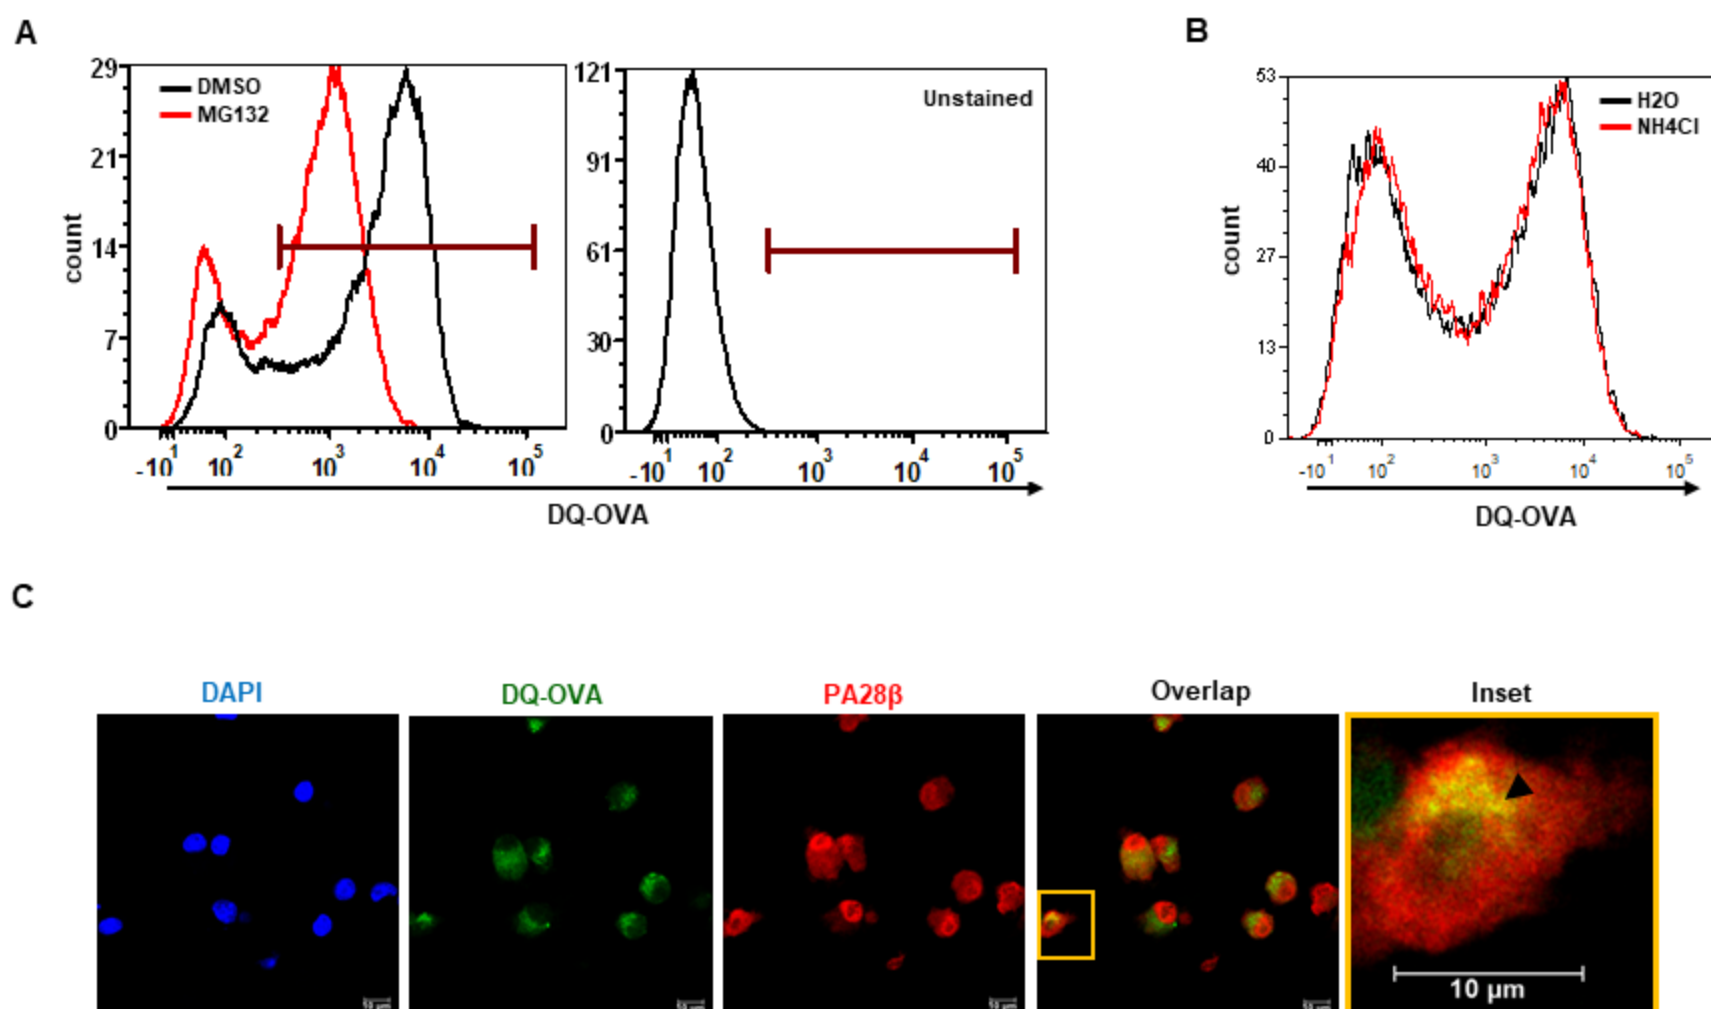

**Figure S7: DQ-OVA processing in BMDC is proteasome-mediated:** **A:** FACS demonstrating reduction in DQ-OVA fluorescence in BMDC after MG132 (proteasome inhibitor) treatment (10uM) for 30 min. as compared to control (DMSO: vehicle control treatment). Marker gate was based on unstained cell histogram. **B:** FACS histogram showing unchanged DQ-OVA fluorescence in BMDC in presence of NH4Cl. **C:** DQ-OVA co-localizes with PA28β (proteasome regulator) in BMDC as demonstrated by confocal microscopy. DAPI (blue) denotes nuclei. Arrow mark (black) shows overlap (yellow spots).

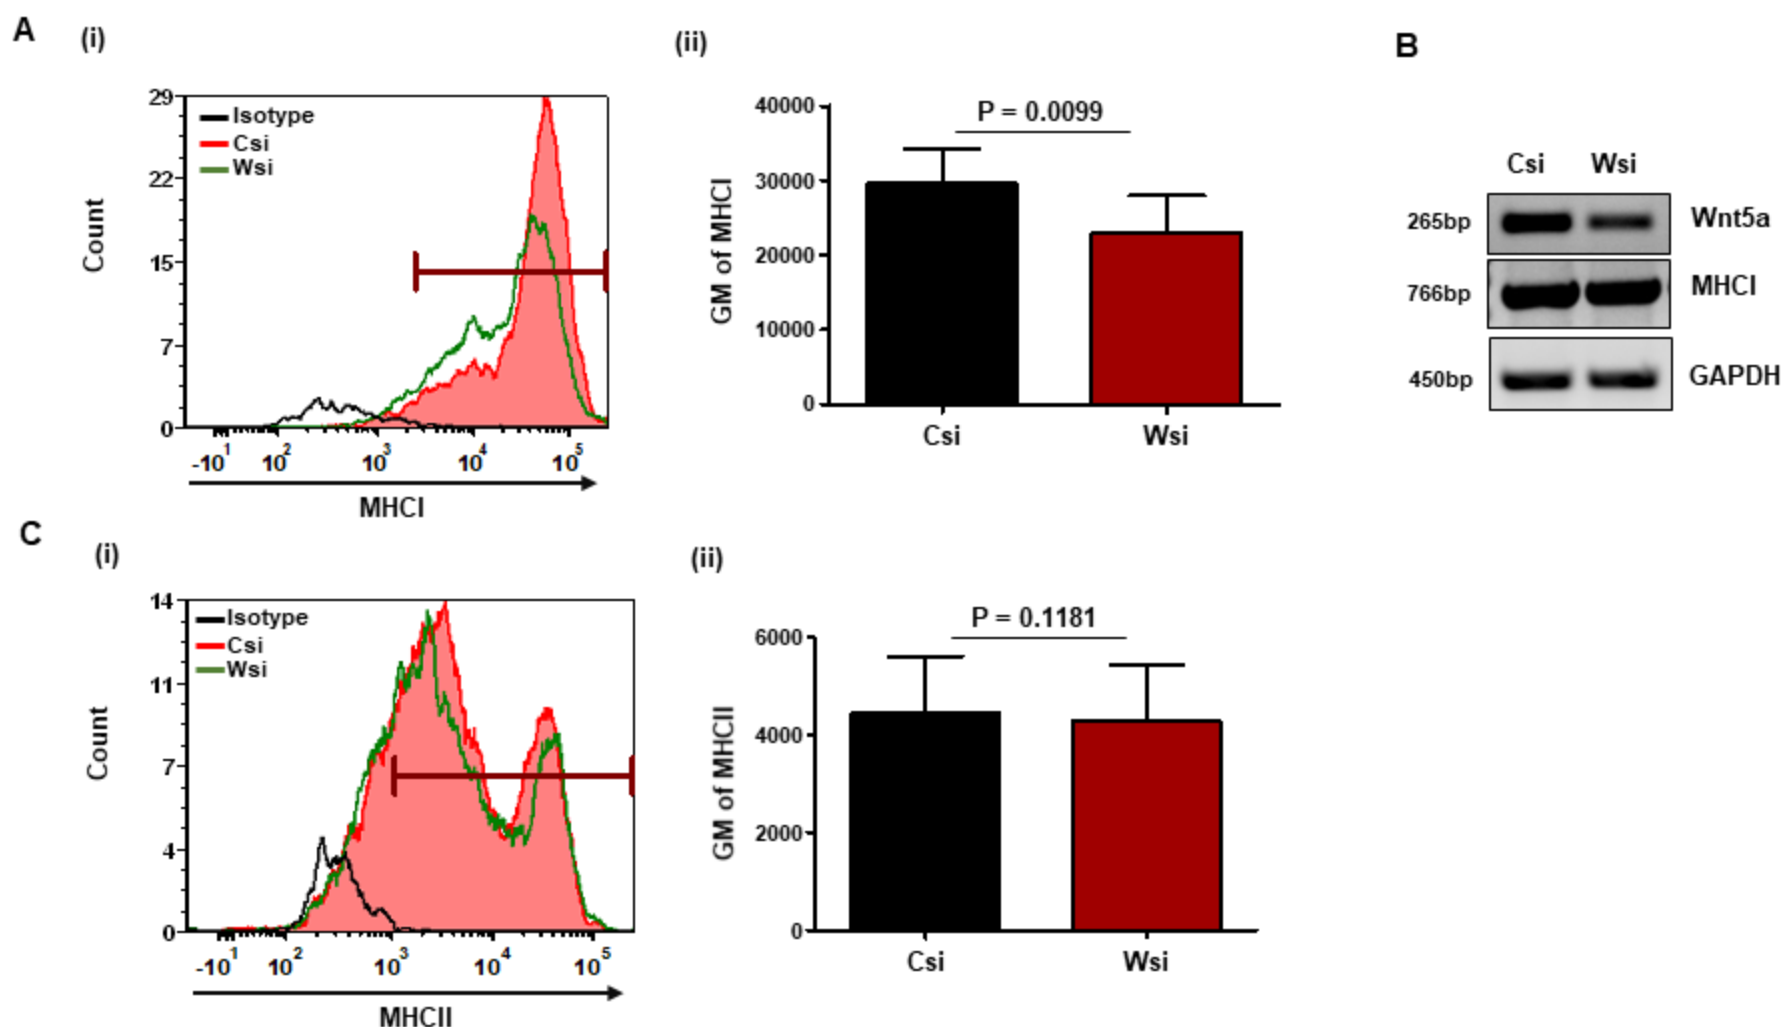

**Figure S8. Surface expression of MHC class I in BMDC is Wnt5A dependent.** **A:** FACS histogram (i) and MFI (GM) graph (ii) showing decrease in surface expression of MHC I in Wnt5A siRNA transfected BMDC (Wsi) as compared to control (Csi) after OVA pulsing. BMDC is gated on CD11c. **B:** RT-PCR analysis shows that MHC I gene expression in BMDC is not changed by Wnt5A depletion through siRNA transfection. **C:** MHC II surface expression is not significantly affected by Wnt5A depletion. Black histogram represents the isotype control.



Supplementary figure 9

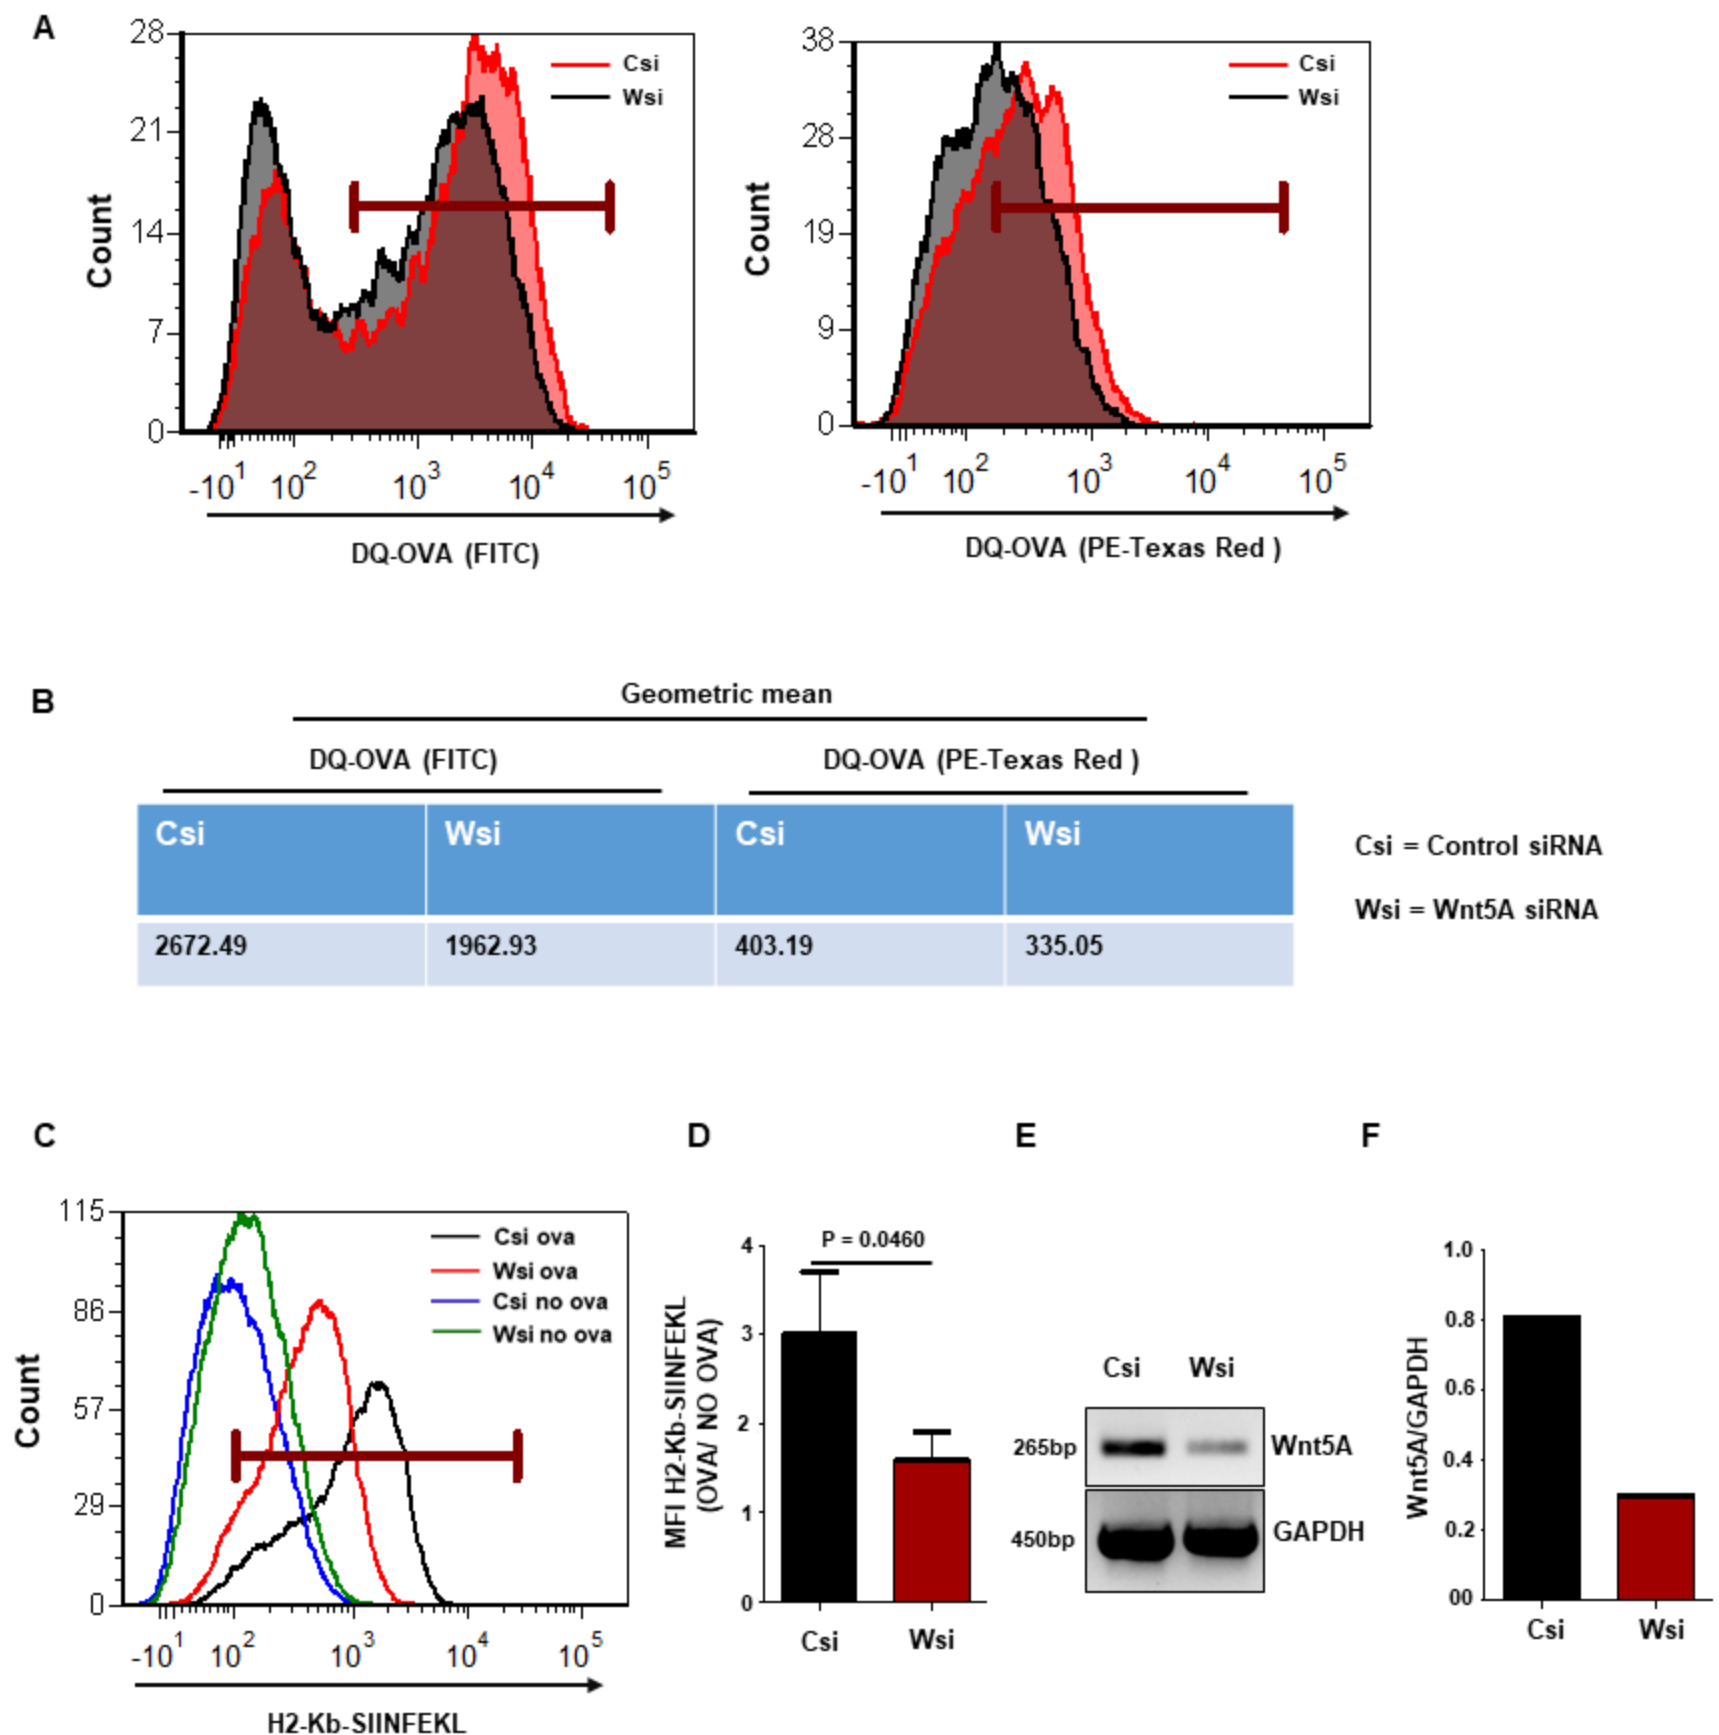

**Figure S9: Reduction of Wnt5A expression in BMDC by siRNA transfection reduces OVA processing and presentation.** **A:** FACS histogram represents reduced DQ-OVA processing in Wnt5A siRNA (Wsi) transfected BMDC as compared to control (Csi) in the FITC and PE-Texas Red channels. **B:** Table depicts geometric mean values of DQ-OVA fluorescence. **C, D:** FACS histogram (C) and corresponding graphical representation (D) of increased OVA-specific H2-Kb-SIINFEKL surface expression (MFI: GM) in control siRNA (Csi) with respect to Wnt5A siRNA (Wsi) sets (n= 4). **E, F:** RT-PCR (E) and corresponding densitometry graph (F) showing the decrease in Wnt5A expression upon Wnt5A siRNA transfection.

Supplementary figure 10

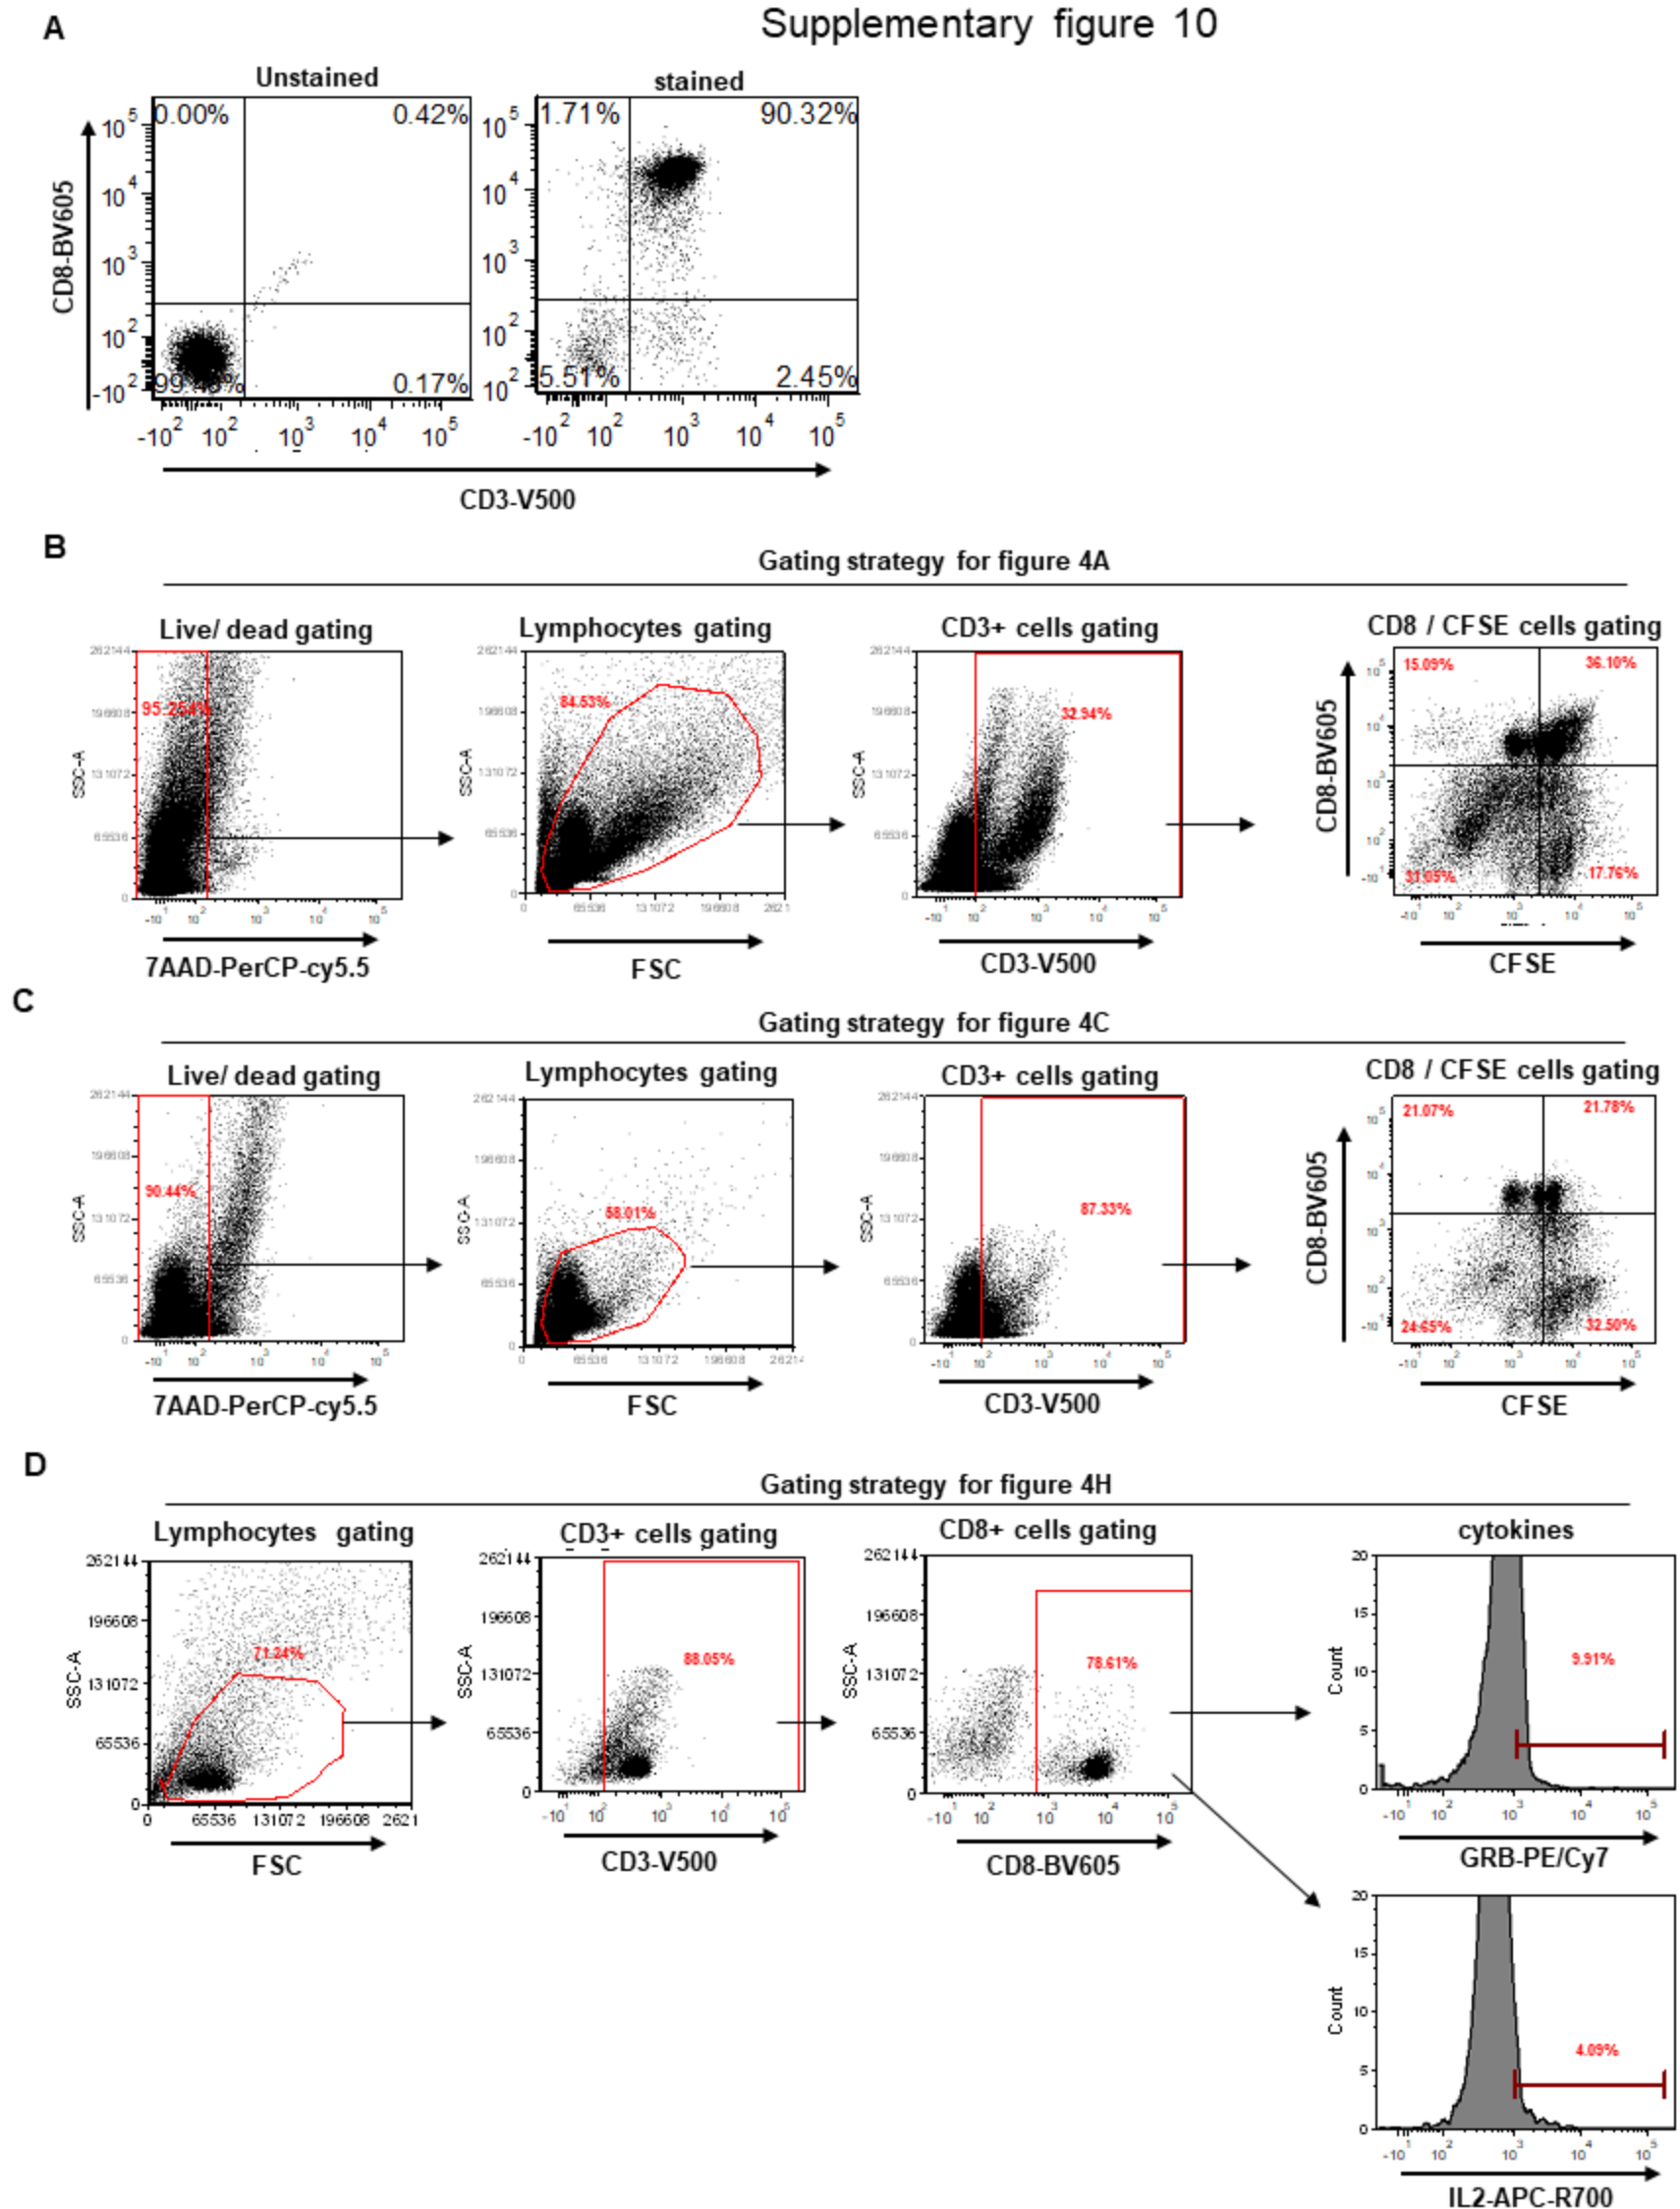

**Figure S10: OVA-sensitized CD8 T cell proliferation and activation upon exposure to antigen-pulsed BMDC.** **A:** Representation of CD8 T cell purity. **B, C:** Representation of gating strategy for CFSE<sup>dim</sup> CD3+CD8+ proliferating T cells after coculture with OVA pulsed BMDC. **D:** Representation of gating strategy for IL2<sup>high</sup> GRB<sup>high</sup> CD3+CD8+ T cells. IL2<sup>high</sup> and GRB<sup>high</sup> cells are gated based on "no OVA" condition as reference.

A

Gating strategy for figure 5A

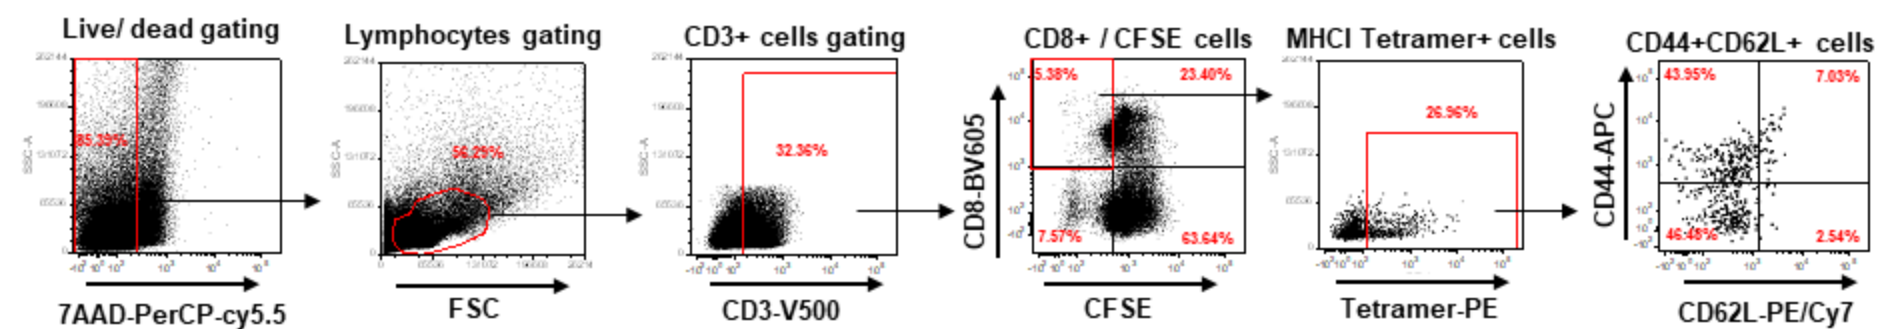

B

Gating strategy for figure 5G

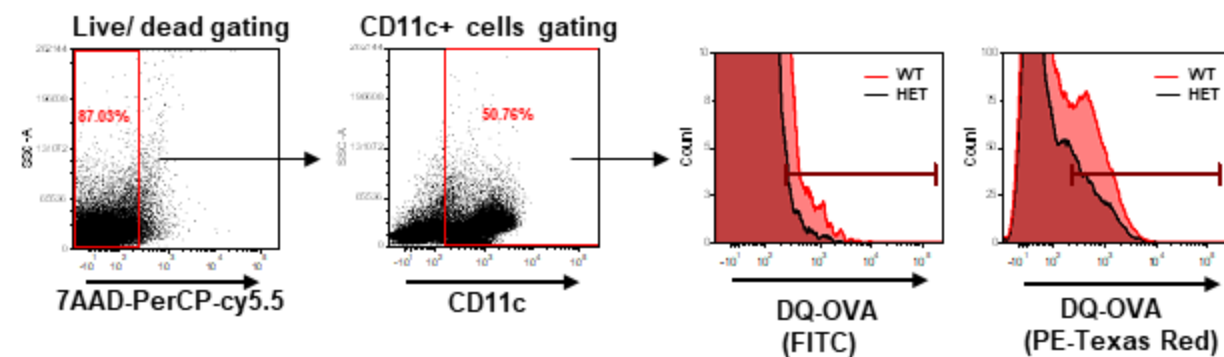

C

Gating strategy for figure 5H

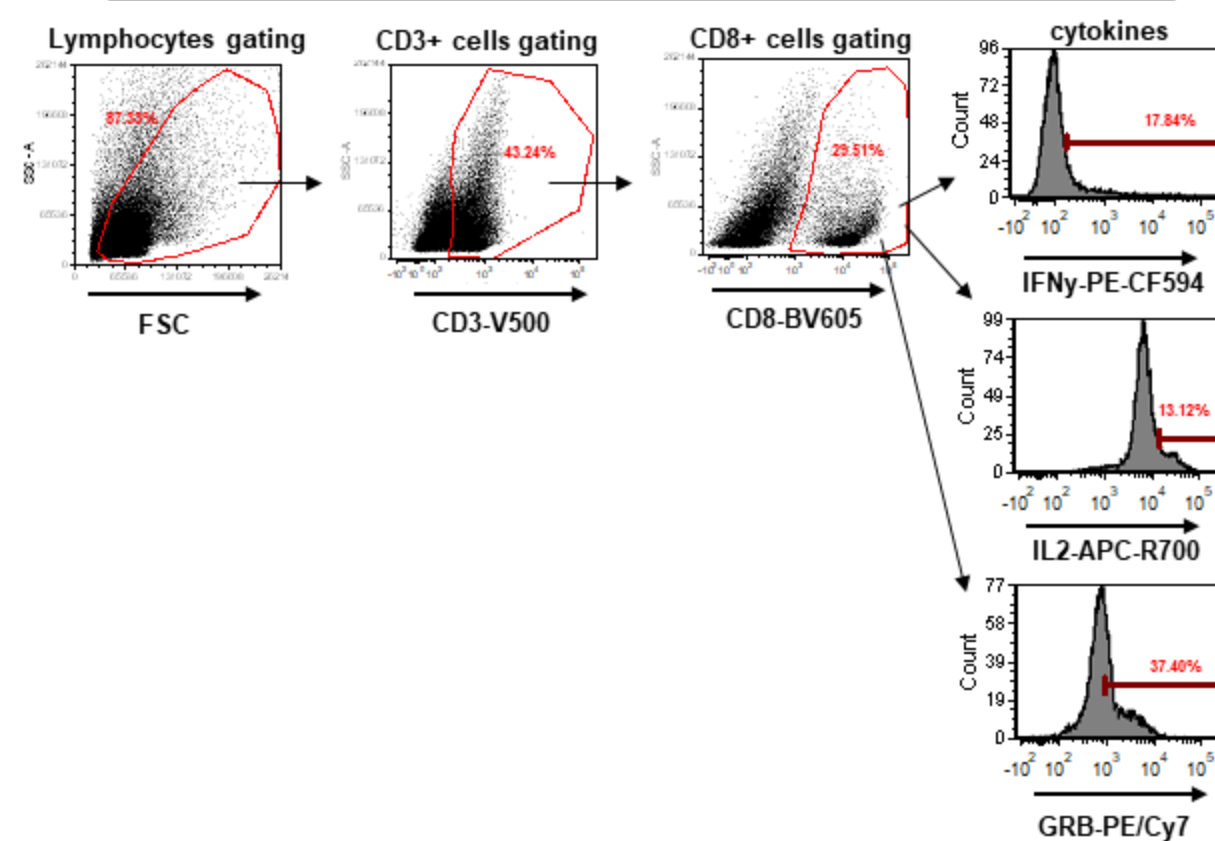

**Figure S11: OVA antigen recall response by CD8 T cells after OVA immunization correlates with OVA processing.** **A:** Representation of gating of live CD3+CD8+ OVA SIINFEKL responsive T cells after restimulation of harvested splenocytes with OVA. **B:** Representation of gating of live CD11c+ cells exhibiting DQ-OVA fluorescence as a measure of OVA processing. **C:** Representation of gating of IFN $\gamma$ <sup>high</sup>, IL2<sup>high</sup> and GRB<sup>high</sup> CD3+CD8+ T cells. Gating for high cytokine producers is based on "no OVA" condition as reference.

**Supplementary Table 1**

| <b>Reagent</b>                             | <b>Company</b>           | <b>Catalogue No.</b>         |
|--------------------------------------------|--------------------------|------------------------------|
| 7-AAD cell viability stain                 | Biolegend                | 420403                       |
| Albumin from chicken egg                   | Sigma-Aldrich            | A5503-1G                     |
| Alexa fluor 555 phalloidin                 | Invitrogen               | A34055                       |
| Anti-human/mouse Wnt5A monoclonal antibody | R & D Systems            | MAB645                       |
| anti-PA28 $\alpha$                         | Santa Cruz Biotechnology | sc-21267                     |
| Anti-PA28 $\beta$                          | Biobharati Life Sciences | BB-AB0190                    |
| anti-rat IgG-HRP                           | R & D Systems            | HAF005                       |
| APC rat anti-mouse CD44                    | BD Biosciences           | 559250                       |
| ANTI-MO SIINFEKL 25D1.16 PE,               | Invitrogen               | 12-5743-81                   |
| APC-hamster anti-mouse CD11c               | BD Biosciences           | 550261                       |
| APC-R700 rat anti-mouse IL-2               | BD Biosciences           | 565186                       |
| Arp2/3 complex Inhibitor I                 | Merck                    | CK-666                       |
| Bradford reagent                           | Biorad                   | 5000006                      |
| Brefeldin                                  | Calbiochem               | 203729-1MG                   |
| BV605-rat anti-mouse CD8                   | BD Biosciences           | 563152                       |
| cDNA synthesis kit                         | Biobharati Life Sciences | BB-E0045                     |
| CFSE                                       | Invitrogen               | C34570                       |
| Complete Freund's Adjuvant (CFA)           | Difco                    | 263810                       |
| control siRNA                              | Eurogentec/ Dharmacon    | SR-CL000-005/ D-001206-13-05 |
| DAPI                                       | Invitrogen               | D1306                        |
| donkey anti-goat alexa fluor 488           | eBioscience              | A-11055                      |
| donkey anti-goat alexa fluor 546           | eBioscience              | A-11056                      |
| donkey anti-rabbit alexa fluor 546         | eBioscience              | A10040                       |
| Dishevelled inhibitor                      | Merck                    | CAS294891-81-9               |
| DQ-OVA                                     | Invitrogen               | D12053                       |
| Fetal Bovine Serum                         | Invitrogen               | 10082147                     |

|                                            |                                   |             |
|--------------------------------------------|-----------------------------------|-------------|
| FITC-OVA                                   | Invitrogen                        | 023020      |
| GM-CSF                                     | Peptotech                         | 315-03      |
| H-2Kb OVA Tetramer-SIINFEKL-PE             | Medical & Biological Laboratories | TS-5001-1C  |
| IL4                                        | Peptotech                         | 214-14      |
| Incomplete Freund's Adjuvant (IFA)         | Difco                             | 263910      |
| L-Glutamine                                | Invitrogen                        | 25030081    |
| Lipofectamine RNAimax                      | Invitrogen                        | 56532       |
| MG132                                      | Millipore                         | 474790      |
| Mini Separator (Macs) Columns              | Miltenyi Biotec                   | 130-042-201 |
| Mouse CD8a+ isolation kit                  | Miltenyi Biotec                   | 130-104-075 |
| OptiMEM                                    | Invitrogen                        | 31985-070   |
| OVA SIINFEKL peptide (257-264)             | Anaspec                           | AS-60193-1  |
| PCR kit                                    | Biobharati Life Sciences          | BB-E0010S   |
| PE-Cyanine 7-rat anti-mouse Granzyme B     | eBioscience                       | 25-8898-82  |
| PE-IgG2a k isotype                         | BD Biosciences                    | 553457      |
| PE-mouse anti-mouse H-2K[d]                | BD Biosciences                    | 553566      |
| PenStrep                                   | Invitrogen                        | 15140122    |
| Per CP-Cy 5.5 rat IgG2b k isotype          | BD Biosciences                    | 550764      |
| Per CP-Cy 5.5-rat anti-mouse I-A/I-E       | BD Biosciences                    | 562363      |
| Poly-l-lysine                              | Sigma-Aldrich                     | P-8920      |
| Prolong glass antifade                     | Invitrogen                        | P36982      |
| Propidium iodide (PI)                      | BD Biosciences                    | 51-66211E   |
| Purified chicken ovalbumin (OVA, grade VI) | Sigma-Aldrich                     | A5503-1G    |
| rat anti-mouse CD62L                       | BD Biosciences                    | 553148      |
| Recombinant Wnt5A                          | Millipore                         | GF146       |
| RPMI 1640                                  | Invitrogen                        | 31800-022   |
| RAC1 inhibitor                             | Merck                             | NSC23766    |

|                                       |                       |                                    |
|---------------------------------------|-----------------------|------------------------------------|
| TMB solution                          | Merck                 | CL07-1000MLCN                      |
| TRIzol reagent                        | Invitrogen            | 15596018                           |
| Tween-20 detergent                    | Merck                 | 655205-250ML                       |
| V500-Syrian hamster anti-mouse<br>CD3 | BD Biosciences        | 560771                             |
| Western HRP substrate                 | Millipore             | WBLUC0500                          |
| Wnt5A siRNA                           | Eurogentec/ Dharmacon | SR-NP001-001/ M-<br>065584-00-0005 |

Table 1: List of reagents used in the study.
